# Supplementary material for: Combined scRNA-seq and bulk transcriptome analysis establishes a stromal signature for predicting prognosis and therapeutic sensitivity in gastric cancer
Source: Research Square preprint supplement (doi:10.21203/rs.3.rs-3996638/v1), 2024-03-14
Supplement: Supplementary file 1 [file 044756ccd2b75891a23e6595.xlsx]

## Sheet: Sheet1
Supplementary Table S1: clinicopathological information of 21 gastric cancer samples used for single-cell RNA sequencing analysis
Dataset	Sample_ID	Age (years)	Gender	Location	TNM_stage	Laurens_subtype	MMR
GSE183904	sample2	74	Male	Antrum	II	Mixed	dMMR
GSE183904	sample3	83	Male	N.A	III	Diffuse	pMMR
GSE183904	sample5	83	Male	Distal	III	Diffuse	pMMR
GSE183904	sample7	62	Male	Antrum	II	Intestinal	pMMR
GSE183904	sample10	73	Male	Antrum	II	Mixed	pMMR
GSE183904	sample12	69	Male	N.A	IV	Metastatic	pMMR
GSE183904	sample13	84	Female	Antrum	I	Intestinal	dMMR
GSE183904	sample16	88	Male	Pylorus	III	Intestinal	dMMR
GSE183904	sample18	68	Female	Antrum	II	Intestinal	pMMR
GSE183904	sample22	74	Male	Antrum	III	Intestinal	dMMR
GSE183904	sample24	67	Female	Body-Antrum	III	Diffuse	pMMR
GSE183904	sample26	86	Female	Antrum	III	Intestinal	pMMR
GSE183904	sample27	66	Female	Antrum	I	Diffuse	dMMR
GSE183904	sample28	70	Female	Proximal	III	Diffuse	pMMR
GSE183904	sample29	64	Male	Body-Antrum	II	Intestinal	pMMR
GSE183904	sample30	55	Male	Antrum	III	Mixed	pMMR
GSE183904	sample32	65	Female	Antrum	I	Intestinal	pMMR
GSE183904	sample33	80	Male	Antrum	III	Intestinal	dMMR
GSE183904	sample36	56	Female	Antrum	IV	Metastatic	N.A.
GSE183904	sample39	73	Female	Antrum	III	Intestinal	pMMR
GSE183904	sample40	60	Male	Antrum	III	Diffuse	pMMR
