# Supplementary material for: Combined scRNA-seq and bulk transcriptome analysis establishes a stromal signature for predicting prognosis and therapeutic sensitivity in gastric cancer
Source: Research Square preprint supplement (doi:10.21203/rs.3.rs-3996638/v1), 2024-03-14
Supplement: Supplementary file 2 [file 8da83bafaf832cb407a0c38e.xlsx]

## Sheet: Sheet1
Supplementary Table S2: List of marker genes of stromal cells (including fibroblasts, pericytes and endothelial cells) identified by single-cell RNA sequencing analysis
	Gene
1	PLVAP
2	VWF
3	MGP
4	HSPG2
5	SPARCL1
6	RAMP2
7	IGFBP7
8	EGFL7
9	PECAM1
10	COL4A1
11	ENG
12	GNG11
13	COL15A1
14	CRIP2
15	ACKR1
16	COL4A2
17	A2M
18	RAMP3
19	SERPINE1
20	SPARC
21	CAV1
22	CLDN5
23	SLC9A3R2
24	CD320
25	PRSS23
26	TCF4
27	CALCRL
28	VWA1
29	AQP1
30	IFITM3
31	TM4SF1
32	ADGRL4
33	SPRY1
34	IGFBP4
35	CD93
36	CAVIN1
37	FKBP1A
38	HYAL2
39	SLCO2A1
40	CD34
41	ESAM
42	FABP5
43	NPDC1
44	CXCL12
45	GSN
46	CLEC14A
47	CYR61
48	EPAS1
49	EMCN
50	SELE
51	SOX18
52	PODXL
53	BCAM
54	ECSCR
55	CDH5
56	FLT1
57	MCAM
58	IFI27
59	TIMP3
60	TGFBR2
61	CD59
62	ARHGAP29
63	THBS1
64	PRCP
65	APP
66	CCL14
67	EMP1
68	PDLIM1
69	NFIB
70	FAM167B
71	PLPP1
72	TM4SF18
73	VAMP5
74	CCDC85B
75	SPTBN1
76	CAVIN3
77	INSR
78	CAVIN2
79	ID3
80	CYYR1
81	ADGRF5
82	KDR
83	PCDH17
84	APLNR
85	ID1
86	CD81
87	HEG1
88	PTPRB
89	STOM
90	ADAM15
91	RAB13
92	FAM198B
93	S1PR1
94	RNASE1
95	SELENOW
96	ITGA5
97	COL18A1
98	S100A13
99	EDN1
100	COL6A2
101	LDB2
102	CLEC3B
103	SYNPO
104	RAI14
105	CTGF
106	HTRA1
107	NRP1
108	NCOA7
109	MMRN2
110	CRIM1
111	IGFBP3
112	F2RL3
113	WWTR1
114	JAM2
115	RCAN1
116	RBP7
117	ACVRL1
118	TIE1
119	ROBO4
120	BMPR2
121	RDX
122	TSPAN7
123	COX7A1
124	ADCY4
125	IL3RA
126	PLXND1
127	NOTCH4
128	GNAI2
129	LIMS2
130	IFITM2
131	ITM2B
132	ICAM2
133	FSTL1
134	RHOC
135	PLPP3
136	C1orf54
137	ITGA6
138	EHD4
139	MCTP1
140	MTUS1
141	PCAT19
142	ADAMTS1
143	THBD
144	CXorf36
145	ITGB1
146	SELP
147	SHANK3
148	PALMD
149	CLIC4
150	PTMS
151	CNN3
152	TMEM255B
153	CD9
154	ELK3
155	RBP5
156	SRP14
157	LAMA4
158	MGST2
159	SERPINH1
160	TMSB10
161	DLC1
162	TMEM204
163	PLS3
164	RGS3
165	MSN
166	NUAK1
167	PKP4
168	TINAGL1
169	NNMT
170	MAP1B
171	FSCN1
172	SWAP70
173	UPP1
174	RGCC
175	IFITM1
176	DSTN
177	TMEM88
178	DYSF
179	ADAMTS9
180	MYCT1
181	CFAP20
182	RAB11A
183	ECE1
184	ENPP2
185	LAMA5
186	CAV2
187	MALL
188	MEF2C
189	TNS2
190	DUSP6
191	DOCK9
192	NAA38
193	ICAM1
194	NES
195	CALD1
196	DPYSL2
197	EFNA1
198	UACA
199	LAMB1
200	FZD4
201	DPYSL3
202	TGM2
203	MYL12B
204	DUSP23
205	SH3TC1
206	PXDN
207	JAG2
208	PDGFB
209	HES1
210	ATOX1
211	SOX17
212	ERG
213	APOLD1
214	GJA1
215	HECW2
216	EID1
217	RHOJ
218	GRB10
219	SEMA3F
220	NOSTRIN
221	LMO2
222	PLCB1
223	RASIP1
224	ABL2
225	VIM
226	MCF2L
227	NECTIN2
228	RAPGEF3
229	RBPMS
230	ENTPD1
231	PDLIM5
232	CCDC3
233	LAMC1
234	PTPRM
235	NR2F2
236	CDH13
237	KANK3
238	SGK1
239	LMCD1
240	LAMB2
241	ACTN1
242	MRPL33
243	TSC22D1
244	GNAS
245	MKL2
246	CXCL14
247	LUM
248	POSTN
249	DCN
250	IGFBP5
251	MFAP4
252	COL3A1
253	APOD
254	CCL11
255	RARRES2
256	COL1A1
257	CFD
258	COL1A2
259	C1S
260	PLAT
261	MMP2
262	SERPING1
263	TMEM176B
264	FBLN1
265	SERPINF1
266	AGT
267	TMEM176A
268	COL6A1
269	CCL2
270	PDGFRA
271	TCF21
272	F3
273	DPT
274	SPON2
275	COL6A3
276	PTGDS
277	VCAN
278	CFH
279	LTBP4
280	TPM2
281	IGFBP6
282	C1R
283	CYGB
284	MFGE8
285	CTSK
286	FHL1
287	TAGLN
288	PDK4
289	APOE
290	EMILIN1
291	SELENOM
292	COL5A1
293	NBL1
294	OLFML3
295	SOD3
296	C11orf96
297	PDPN
298	PCOLCE
299	COL5A2
300	DKK3
301	TFPI
302	LGALS1
303	AEBP1
304	TRPA1
305	BMP4
306	SDC2
307	EDIL3
308	HSD17B2
309	MXRA5
310	ADH1B
311	FOXF1
312	EFEMP1
313	MXRA8
314	MYL9
315	CTSC
316	PLAU
317	COL12A1
318	NID1
319	AC245595.1
320	PLAC9
321	PTGS1
322	C3
323	LAPTM4A
324	NSG1
325	EDNRB
326	EFEMP2
327	TGFBI
328	QSOX1
329	NRG1
330	ECM1
331	CCDC80
332	CEBPD
333	GGT5
334	FBLN5
335	CRISPLD2
336	LOXL2
337	ABCA8
338	RBP1
339	FOS
340	EGR1
341	PALLD
342	FENDRR
343	PMP22
344	ACTA2
345	F2R
346	MEG3
347	PDGFD
348	LTBP1
349	TPM1
350	PTN
351	SCPEP1
352	TNXB
353	GPX3
354	LGALS3BP
355	ADM
356	ALDH1A3
357	CLEC11A
358	GEM
359	PLTP
360	SGCE
361	RCN1
362	BEX3
363	LHFPL6
364	FKBP10
365	PROCR
366	TIMP2
367	ANXA5
368	THY1
369	MFAP2
370	NR2F1
371	TSPAN4
372	PLOD2
373	FILIP1L
374	EMID1
375	TMEM100
376	ASPN
377	CD63
378	PHLDA1
379	CXCL1
380	CDH11
381	PPIB
382	PPP1R14A
383	HAPLN1
384	CALU
385	TUSC3
386	TCIM
387	CRTAP
388	FBN1
389	SERPINE2
390	BGN
391	PAPPA
392	WFDC1
393	DIO2
394	GADD45G
395	FXYD1
396	BST2
397	LOX
398	PKIG
399	ISLR
400	LRP1
401	FN1
402	PDLIM3
403	CYBRD1
404	RHOBTB3
405	TMEM119
406	NFIC
407	BSG
408	EMP2
409	RTL8C
410	SPON1
411	PCDH18
412	DMKN
413	EPHX1
414	PLXDC2
415	TGFB1I1
416	COL4A5
417	CYB5R3
418	CERCAM
419	MRC2
420	FHL2
421	ANGPTL2
422	CD302
423	SMPDL3A
424	IER3
425	WLS
426	NDUFA4
427	MT1M
428	RCN2
429	SMIM3
430	C9orf3
431	NPTN
432	CPQ
433	TCEAL9
434	ANTXR1
435	EHD2
436	PRKG1
437	RAB34
438	PRR16
439	ENHO
440	LINC01082
441	IL1R1
442	NUPR1
443	FGF7
444	SCARB2
445	TSPAN2
446	APLP2
447	ELN
448	MYLK
449	RND3
450	CST3
451	TMEM98
452	NEXN
453	TIMP1
454	VCAM1
455	TSPAN12
456	CTSF
457	CD151
458	MMP14
459	SELENOP
460	GRK5
461	GADD45B
462	RGS5
463	NDUFA4L2
464	FRZB
465	ADIRF
466	NOTCH3
467	CSRP2
468	PDGFRB
469	COX4I2
470	IGFBP2
471	CD248
472	ITGA1
473	CSRP1
474	COL14A1
475	CD36
476	MYH11
477	PLXDC1
478	GJA4
479	ANGPT2
480	HIGD1B
481	MYO1B
482	TNC
483	GUCY1B1
484	CRYAB
485	EDNRA
486	OLFML2A
487	JAG1
488	TPM4
489	FAM162B
490	ADAMTS4
491	OLFML2B
492	RGS16
493	CHN1
494	EPS8
495	CCDC102B
496	MIR4435-2HG
497	ID4
498	SYNPO2
499	PTP4A3
500	TPPP3
501	PGF
502	MMP11
503	CYTOR
504	MYL6
505	HES4
506	FLNA
507	TBX2
508	GJC1
509	EFHD1
510	SORBS3
511	COL5A3
512	NREP
513	ISYNA1
514	STEAP4
515	LPP
516	VCL
517	HEYL
518	COLEC11
519	C1QTNF1
520	CSPG4
521	MAP3K20
522	MGST3
523	VASN
524	LURAP1L
525	EGFL6
526	PTK2
527	EBF1
528	HCFC1R1
529	MYH9
530	TNS1
531	ARHGEF17
532	MARCKS
533	ENPEP
534	LRRC32
535	MRVI1
536	PDGFA
537	RAB31
538	SLIT3
539	CNN1
540	CALM2
541	H2AFJ
542	KCNE4
543	CPE
544	CDH6
545	FOXS1
546	DBNDD2
547	GUCY1A1
548	ILK
549	TNS3
550	ANXA6
551	FERMT2
552	KCNJ8
553	PRRX1
554	ANO1
555	GUCY1A2
556	EGFLAM
557	AXL
558	PARVA
559	TUBA1A
560	PEAK1
561	TMEM47
562	ADAMTS2
563	RCAN2
564	KIAA0040
565	KLF9
566	DUSP14
567	MSRB3
568	RRAS
569	KANK2
570	CARMN
571	SH3BGRL
572	RASD1
