# Supplementary material for: Combined scRNA-seq and bulk transcriptome analysis establishes a stromal signature for predicting prognosis and therapeutic sensitivity in gastric cancer
Source: Research Square preprint supplement (doi:10.21203/rs.3.rs-3996638/v1), 2024-03-14
Supplement: Supplementary file 3 [file b505511ec9c6e1e886653ac2.xlsx]

## Sheet: Sheet1
Supplementary Table S3: List of prognostic stromal genes
Gene	pval	HR	Low 95%CI	High 95%CI
PLVAP	0.0291944	1.2771	1.02508	1.59107
VWF	0.00174933	1.34287	1.11649	1.61515
SPARCL1	0.0308806	1.12798	1.01114	1.25832
RAMP2	0.0371416	1.22226	1.01204	1.47616
IGFBP7	0.00235083	1.3205	1.10394	1.57955
PECAM1	0.037015	1.23811	1.01295	1.51331
COL4A1	0.00113533	1.41555	1.14825	1.74507
ENG	0.0110595	1.35487	1.0719	1.71255
GNG11	0.00680962	1.34055	1.08416	1.65759
COL15A1	0.0141363	1.22822	1.04224	1.44739
COL4A2	0.00288995	1.34458	1.1066	1.63373
A2M	0.0265447	1.18869	1.02032	1.38483
SERPINE1	3.2284e-05	1.31022	1.15349	1.48824
SPARC	0.000842142	1.333	1.12602	1.57803
CAV1	0.00378379	1.21268	1.06429	1.38176
SLC9A3R2	0.00483848	1.46436	1.12311	1.9093
PRSS23	0.00582948	1.29171	1.07682	1.54949
TCF4	0.0468813	1.32361	1.00387	1.74518
ADGRL4	0.0105275	1.39998	1.08184	1.81169
SPRY1	0.0317031	1.38157	1.02872	1.85546
CD93	0.00918483	1.32243	1.07166	1.63189
CAVIN1	0.00850672	1.21463	1.05086	1.40393
SLCO2A1	0.00146205	1.32802	1.11511	1.58158
CD34	0.0204414	1.31515	1.04324	1.65793
ESAM	0.0354183	1.30375	1.01827	1.66927
CLEC14A	0.0215524	1.28746	1.03788	1.59705
SELE	0.0370525	1.22816	1.01242	1.48989
CDH5	0.0269398	1.29607	1.03003	1.63083
FLT1	0.0373415	1.34809	1.01766	1.7858
MCAM	0.0150498	1.2388	1.04238	1.47224
TIMP3	0.0279065	1.16462	1.01668	1.33408
CD59	0.0134866	1.39989	1.07201	1.82807
ARHGAP29	0.0244502	1.42781	1.04698	1.94716
THBS1	0.00794802	1.21223	1.05163	1.39736
TM4SF18	0.0148429	1.3968	1.06751	1.82768
CYYR1	0.029729	1.30533	1.02654	1.65982
ADGRF5	0.024346	1.34294	1.03893	1.73591
PCDH17	0.0173974	1.38552	1.05902	1.81268
APLNR	0.0307631	1.19857	1.01693	1.41266
ID1	0.0226272	0.838743	0.721056	0.97564
HEG1	0.0123494	1.29037	1.05678	1.5756
STOM	0.0381754	1.23896	1.01175	1.51719
S1PR1	0.0394972	1.22835	1.00994	1.494
RNASE1	0.00570828	1.2145	1.05816	1.39393
ITGA5	0.0327801	1.18534	1.01402	1.38561
COL18A1	0.018396	1.2386	1.03675	1.47976
COL6A2	0.00909945	1.22975	1.05275	1.4365
LDB2	0.00961555	1.51481	1.10622	2.07434
RAI14	0.00427331	1.42971	1.1188	1.82702
HTRA1	0.00655344	1.27516	1.07019	1.51939
NRP1	0.000372465	1.56882	1.22424	2.0104
MMRN2	0.00394216	1.36938	1.10586	1.69568
CRIM1	0.0161505	1.38074	1.06158	1.79587
F2RL3	0.0479223	1.21466	1.00178	1.47277
RCAN1	0.0112271	1.43406	1.08528	1.89492
TIE1	0.00447893	1.41597	1.11402	1.79977
ROBO4	0.0108849	1.4529	1.08984	1.93692
TSPAN7	0.0311713	1.21446	1.01773	1.44922
NOTCH4	0.0291171	1.41141	1.03567	1.92348
FSTL1	0.00759736	1.27462	1.06662	1.52319
ADAMTS1	0.0225916	1.20499	1.02654	1.41446
THBD	0.0020946	1.34311	1.113	1.6208
SELP	0.0328391	1.19183	1.01442	1.40027
ELK3	0.00862053	1.47153	1.10303	1.96313
LAMA4	0.00182462	1.37474	1.12543	1.67928
DLC1	0.00471438	1.37729	1.10307	1.71969
TMEM204	0.023885	1.30934	1.03632	1.65429
NUAK1	0.00668562	1.46688	1.11211	1.93484
NNMT	0.0117375	1.21421	1.04407	1.41206
MAP1B	0.0231925	1.18015	1.0229	1.36159
UPP1	0.0182486	1.40367	1.05923	1.86012
DYSF	0.0285601	1.30583	1.02837	1.65815
MYCT1	0.0215161	1.39888	1.05072	1.8624
CAV2	0.036037	1.18279	1.01099	1.38377
CALD1	0.0169994	1.15127	1.02551	1.29245
LAMB1	0.0118272	1.37211	1.07255	1.75535
FZD4	0.0166575	1.39273	1.06192	1.82659
DPYSL3	0.0112702	1.15452	1.03309	1.29022
PXDN	0.000424024	1.46848	1.18598	1.81827
PDGFB	0.0361637	1.29821	1.01697	1.65721
SOX17	0.0406668	1.30999	1.01154	1.69651
ERG	0.00911433	1.44642	1.09602	1.90884
GJA1	0.00268317	1.27105	1.08681	1.48652
EID1	0.0334575	1.30725	1.02121	1.67341
RHOJ	0.0315376	1.25869	1.02057	1.55237
GRB10	0.0303269	1.34801	1.02879	1.76628
RASIP1	0.0196306	1.35165	1.0494	1.74096
ABL2	0.0298596	1.6386	1.04938	2.55866
VIM	0.00709386	1.32905	1.08046	1.63485
CCDC3	0.00933753	1.33464	1.07359	1.65916
LAMC1	0.00685475	1.30155	1.0752	1.57555
PTPRM	0.0106055	1.3647	1.07514	1.73224
CDH13	0.0158491	1.60145	1.09233	2.34787
ACTN1	0.0403545	1.22286	1.00889	1.48222
LUM	0.00927472	1.21306	1.0488	1.40305
POSTN	0.00329861	1.22731	1.07059	1.40698
DCN	0.0168991	1.18673	1.03122	1.36569
IGFBP5	0.0225323	1.17293	1.02272	1.3452
COL3A1	0.00511414	1.21311	1.05966	1.38879
APOD	0.00198229	1.13774	1.0484	1.23469
COL1A1	0.00644927	1.19074	1.05019	1.35011
COL1A2	0.00591835	1.21238	1.057	1.39059
PLAT	0.0163655	1.33873	1.05501	1.69876
MMP2	0.0179818	1.18337	1.02932	1.36048
FBLN1	0.0297685	1.12276	1.01142	1.24634
SERPINF1	0.010111	1.19469	1.04324	1.36813
AGT	0.030616	1.1312	1.01159	1.26495
COL6A1	0.0205152	1.22035	1.03115	1.44428
PDGFRA	0.00609652	1.30106	1.07799	1.57029
SPON2	0.0313342	1.21232	1.0174	1.4446
COL6A3	0.0173538	1.20156	1.03288	1.39779
VCAN	0.000743314	1.32893	1.12652	1.5677
TPM2	0.046348	1.11161	1.00171	1.23357
IGFBP6	0.00393543	1.26755	1.07888	1.48922
CYGB	0.0479479	1.23666	1.00192	1.5264
MFGE8	0.00169917	1.4237	1.14184	1.77514
CTSK	0.0299816	1.23707	1.02084	1.49911
TAGLN	0.0386988	1.10274	1.00509	1.20987
PDK4	0.0296504	1.11844	1.01112	1.23715
EMILIN1	0.0443365	1.15999	1.00377	1.34054
COL5A1	0.00389596	1.25083	1.07448	1.45612
OLFML3	0.0336133	1.17643	1.01268	1.36667
C11orf96	0.0448074	1.16027	1.00345	1.34159
PDPN	0.0285021	1.24253	1.0231	1.50901
COL5A2	0.00208149	1.31317	1.10404	1.5619
TFPI	0.00929757	1.2945	1.06568	1.57245
LGALS1	0.0234915	1.2199	1.02716	1.44881
AEBP1	0.00871016	1.2007	1.04733	1.37653
SDC2	0.000471009	1.42394	1.16804	1.7359
EDIL3	0.00809746	1.31619	1.07399	1.613
EFEMP1	0.00877275	1.17341	1.04114	1.32247
MXRA8	0.00558421	1.20812	1.05691	1.38096
MYL9	0.0230541	1.11203	1.01471	1.21869
COL12A1	0.0122295	1.21817	1.0439	1.42153
NID1	0.00908433	1.29176	1.06575	1.56571
PTGS1	0.0375067	1.24551	1.01277	1.53174
EDNRB	0.021715	1.30676	1.03986	1.64217
EFEMP2	0.0178885	1.26455	1.04127	1.53572
TGFBI	0.0480272	1.15756	1.00127	1.33824
CCDC80	0.0242054	1.13622	1.01679	1.26967
GGT5	0.0145567	1.2479	1.04478	1.49052
FBLN5	0.0264558	1.19553	1.0211	1.39975
CRISPLD2	0.0235863	1.23117	1.02831	1.47405
LOXL2	0.0125695	1.33624	1.0642	1.67782
ABCA8	0.0438566	1.23353	1.0058	1.51282
ACTA2	0.0164399	1.13674	1.02373	1.26222
F2R	0.00375826	1.34462	1.10057	1.64279
PDGFD	0.0182543	1.28133	1.04295	1.5742
GPX3	0.00360378	1.215	1.06569	1.38524
GEM	0.0428101	1.17609	1.00527	1.37594
PLTP	0.0187857	1.19682	1.03025	1.39031
SGCE	0.00606072	1.51567	1.12623	2.03979
BEX3	0.00244342	1.23658	1.07789	1.41864
LHFPL6	0.0113407	1.25517	1.05269	1.49659
FKBP10	0.00318203	1.18913	1.05984	1.3342
TIMP2	0.00219886	1.32366	1.10618	1.5839
ANXA5	0.00801018	1.43224	1.09824	1.86782
THY1	0.0175608	1.23232	1.03716	1.46421
MFAP2	0.0258506	1.18252	1.0204	1.37039
PLOD2	0.000567798	1.4779	1.18351	1.84552
FILIP1L	0.0426482	1.18037	1.00551	1.38563
ASPN	0.00536843	1.1763	1.04924	1.31876
CDH11	0.00384663	1.32169	1.09394	1.59686
PPP1R14A	0.0211702	1.15327	1.02157	1.30195
CALU	0.0426819	1.3711	1.01046	1.86045
TUSC3	0.0274559	1.21652	1.02202	1.44804
FBN1	0.00196726	1.28675	1.09688	1.50949
BGN	0.0101395	1.20508	1.04534	1.38924
PAPPA	0.00267455	1.44714	1.13696	1.84195
LOX	0.00250209	1.31103	1.09992	1.56267
ISLR	0.0162239	1.15521	1.027	1.29942
LRP1	0.0100554	1.29637	1.06387	1.57967
FN1	0.00647906	1.1806	1.0476	1.33048
PDLIM3	0.0467981	1.13194	1.00176	1.27904
RHOBTB3	0.0339239	1.2169	1.01501	1.45893
TMEM119	0.0407339	1.16654	1.00652	1.352
RTL8C	0.0112116	1.30758	1.06281	1.60872
PCDH18	0.00478745	1.42194	1.11343	1.81593
PLXDC2	0.00333393	1.29992	1.09106	1.54877
TGFB1I1	0.0132563	1.20838	1.04029	1.40362
COL4A5	0.0131324	1.2647	1.05049	1.52258
CERCAM	0.0179654	1.23124	1.03637	1.46276
ANGPTL2	0.0288832	1.18043	1.01724	1.36981
TCEAL9	0.0377966	1.20711	1.01067	1.44174
ANTXR1	0.007255	1.23761	1.05925	1.446
EHD2	0.00818944	1.24221	1.05773	1.45887
PRKG1	0.0227592	1.37232	1.04511	1.80198
RAB34	0.00501619	1.25748	1.07152	1.47571
APLP2	0.0198436	1.42545	1.05782	1.92085
ELN	0.0132858	1.17152	1.03354	1.32792
GADD45B	0.0218517	1.26236	1.03441	1.54054
RGS5	0.0380418	1.17479	1.00893	1.36793
NDUFA4L2	0.0477447	1.19199	1.00175	1.41835
NOTCH3	0.0233551	1.24951	1.03068	1.5148
PDGFRB	0.00824054	1.26482	1.06253	1.50563
CD248	0.0290468	1.22212	1.02069	1.46331
ITGA1	0.0290998	1.22921	1.02123	1.47954
COL14A1	0.0290292	1.14387	1.01383	1.29058
CD36	0.0139238	1.26745	1.04929	1.53096
PLXDC1	0.00573859	1.57669	1.14141	2.17797
GJA4	0.0451118	1.24843	1.00485	1.55107
ANGPT2	0.0364221	1.26663	1.01505	1.58056
HIGD1B	0.0045264	2.22989	1.28184	3.87912
GUCY1B1	0.0135905	1.25492	1.04785	1.50292
EDNRA	0.00277503	1.32708	1.10251	1.59741
OLFML2A	0.00985087	1.33395	1.0718	1.66024
FAM162B	0.00203633	1.61536	1.1911	2.19075
OLFML2B	0.00528139	1.23809	1.06556	1.43854
PGF	0.0203711	1.41299	1.05504	1.89239
MMP11	0.0330316	1.12096	1.00924	1.24505
FLNA	0.0279392	1.12917	1.01325	1.25835
GJC1	0.0386711	1.24149	1.01133	1.52403
NREP	0.00142568	1.99834	1.30587	3.05799
STEAP4	0.0258851	1.25063	1.02726	1.52256
HEYL	0.00329784	1.27606	1.08457	1.50137
COLEC11	0.0251702	1.32511	1.03568	1.69542
C1QTNF1	0.0477078	1.18273	1.0017	1.39648
VASN	0.0184835	1.2726	1.04134	1.55523
ARHGEF17	0.0169068	1.301	1.04836	1.61452
MARCKS	9.52266e-05	1.93795	1.39004	2.70182
ENPEP	0.00655378	1.43238	1.10549	1.85594
LRRC32	0.00610433	1.26455	1.06924	1.49554
PDGFA	0.0197018	1.28021	1.04019	1.5756
RAB31	0.0233988	1.25509	1.03124	1.52754
KCNE4	0.0151108	1.26987	1.04727	1.53979
CPE	0.0087054	1.18085	1.04294	1.337
CDH6	0.00270171	1.74361	1.21253	2.5073
FOXS1	0.0034435	1.31579	1.09478	1.58142
FERMT2	0.00693574	1.21936	1.05586	1.40819
KCNJ8	0.0091494	1.34049	1.07539	1.67094
GUCY1A2	0.00277408	1.86176	1.23905	2.79743
EGFLAM	0.00144612	1.80715	1.25563	2.60093
AXL	0.000463876	1.38944	1.15577	1.67037
PARVA	0.0161765	1.29004	1.04825	1.58761
TUBA1A	0.0106319	1.20762	1.04489	1.3957
RCAN2	0.0352533	1.17806	1.01139	1.37221
KLF9	0.0357115	1.20526	1.01254	1.43466
MSRB3	0.0139328	1.17489	1.03325	1.33594
RASD1	0.0443314	1.16163	1.00381	1.34428
